1 **Field decomposition of Bt-506 corn leaf and its effect on Collembola in the black**  
2 **soil region of Northeast China**

3 Baifeng Wang<sup>1</sup>✉, Fengci Wu<sup>1</sup>✉, Junqi Yin<sup>1</sup>, Ling Zhang<sup>1</sup>, Xinyuan Song<sup>1\*</sup>

4 **Author address:**

5 <sup>a</sup> Agro-Biotechnology Research Institute, Jilin Provincial Key laboratory of Agricultural  
6 Biotechnology Jilin Academy of Agriculture Sciences, Changchun 130033, China.

7 ✉These authors contributed equally to this work.

8 \* [songxinyuan1980@163.com](mailto:songxinyuan1980@163.com)

9

10 **Abstract**

11 The litters of Bt corn would go into the soil through straw returning and field ploughing  
12 after cultivation. TO clarify whether the leaf litter decomposition rate and the non-target  
13 soil Collembola were influenced by the Bt protein or other litter properties in leaf litters  
14 of Bt corn in Northeast China, leaf litterbags of Bt-506, its near isoline Zheng 58 and a  
15 local type Zhengdan 958 were used in the field in Northeast China. The leaf  
16 decomposition rate, the leaf properties and the collembolan community in litterbags  
17 were investigated later. After seven months, only 43.5 ng/g Bt protein in Bt-506 leaf  
18 litter was left. All the investigated indices were not significantly different between  
19 Bt-506 and its near isoline Zheng 58. But when compared with local type Zhengdan 958,  
20 Bt-506 and its near isoline Zheng 58 contained lower non-structural carbohydrate  
21 content but higher total nitrogen content, and had lower litter decomposition rate and  
22 less abundance of Collembola. Collembolan abundance and litter decomposition rate  
23 were both significantly correlated with the non-structural carbohydrate and total

24 nitrogen contents of the leaf litters. Field study results revealed Bt protein did not affect  
25 the leaf litter decomposition rate and the collembolan community in leaf litterbags in  
26 short term. The significant differences of these investigated indices among corn types  
27 were caused by the different non-structural carbohydrate and total nitrogen contents in  
28 leaf litter.

29

## 30 **Introduction**

31 Bt corn is developed to combat lepidopteran pests [1], and the wide planting of Bt corn  
32 can greatly reduce insecticide applications and labour requirements [2, 3]. The litters of  
33 Bt corns would go into the soil by straw returning and field ploughing. The Bt protein  
34 from these litters will persist for a long time, even more than 200 days in the soil [4].

35 The potential impacts of the Bt protein from transgenic crop on litter  
36 decomposition and non-target soil fauna have been reported in many studies. The results  
37 of the studies varied according to study materials and site. Most of the studies indicated  
38 that the Bt protein itself did not affect the decomposition rate of transgenic plant and  
39 non-target soil fauna [5-8]. However there were a few studies indicated that the  
40 decomposition rate of the litters and non-target soil fauna in the litters were directly  
41 related to the Bt protein for Bt crops [9, 10]. Besides, the litter property of Bt crop  
42 might have been changed by the transformation of exogenous gene. For example,  
43 Saxena and Stotzky [11] found that Bt corn had a higher lignin content compared with  
44 non-Bt corn, further Fang et al. [12] found that the lignin, lignin/nitrogen ratio and total  
45 organic carbon contents in Bt corn were higher than in non-Bt corn. Additionally, some  
46 researchers have found that the total amount of nitrogen per unit litter could influence  
47 fungal and bacterial populations in microcosms [13, 14]. Thus, the decomposition  
48 process of corn leaf litters [5, 12, 15], as well as non-target soil fauna in the field [16],  
49 were probably influenced by the significantly different leaf properties among the corn  
50 types through an influence on the activity of microbial communities.

51 Bt-506 is a new *CryIAc* corn in breed line that was independently developed by  
52 the China Agricultural University. In China, the black soil region is the most important

53 location for corn production. Therefore, it is of great significance to assess the litter  
54 decomposition rate of Bt-506 corn and its effect on soil fauna in the black soil region of  
55 China.

56 Collembola are one of the most ubiquitous soil fauna, which include numerous  
57 species and play an important role in nutrient cycling of the soil system [17-19].  
58 Generally Collembola can be good indicators of soil quality as they are sensitive to soil  
59 environmental change [20-22]. Collembola may directly or indirectly come into contact  
60 with the Bt toxin by feeding on the living root tissues and the litters of Bt plants, or soil  
61 fungi, microorganisms, and organisms (worms, protozoans) in the field with Bt plants  
62 [23, 24]. Some studies had been conducted to explore the effects of Bt plant cultivation  
63 on soil Collembola in recent years [5, 9, 25-28], while most of these studies were  
64 conducted during planting seasons [25-28]. At present, there were two studies were  
65 carried out in field to evaluate the effect of Bt litters on Collembola community at  
66 family level [5, 9]. The results didn't show any major changes in the composition of the  
67 soil collembolan community. But one of the two studies [9] found that the species of the  
68 Tullbergiidae of Collembolan were much less in Bt crop field than in non-Bt crop field.  
69 Furthermore, the two studies just identified the Collembola at family level. However,  
70 the Collembola is rich in species, and nearly 9000 species have been reported  
71 worldwide [29]. After a long term adaptation and evolution, the ecological niche and  
72 function of different collembolan species in the same family are not exactly the same  
73 [17, 18]. Thus investigating collembolan at species level is a more accurate way to  
74 study the response of collembolan community to environmental changes [25] and  
75 allows to analyse the response mechanism [28]. Till now, the effects of Bt crop litter on

76 Collembola at species level were just carried out in laboratory conditions [30-34].

77 Therefore, we carried the following study in field conditions to assess the effect of  
78 Bt corn litter on soil Collembola at species level. Field trials were carried out in the  
79 black soil region of Northeast China in 2013 and 2014, with crop Bt-506, its near isoline  
80 Zheng 58, and a local crop type Zhengdan 958 as experimental materials. The litterbags  
81 of the three corn types were buried into the field after the autumn harvest, and then the  
82 remained litter weight, the Bt protein content, the non-structural carbohydrate content,  
83 the total nitrogen content and the collembolan community in the litter were investigated  
84 at three stages in the next year. The specific objectives of the present study were to  
85 clarify: 1) whether the transformation of exogenous gene affects the decomposition rate  
86 and leaf litter properties of Bt-506 corn in field; 2) whether the decomposition of  
87 transgenic Bt-506 corn affects soil Collembola at the species level in litterbag.

88

## 89 **Materials and methods**

### 90 **Corn types and study field**

91 Three corn types, transgenic corn Bt-506, its corresponding non-transformed near  
92 isoline Zheng 58 (control) and a predominant local corn type Zhengdan 958 (Zheng 58  
93 × Chang 7-2) were used in this study. Bt-506 is a newly developed *CryIAc* corn inbred  
94 line by China Agricultural University. The seeds of Bt-506 and Zheng 58 were provided  
95 by China Agricultural University, and the seeds of Zhengdan 958 were provided by the  
96 Jilin Academy of Agriculture Sciences.

97 Corn were cultivated at an experimental farm of Jilin Academy of Agriculture  
98 Sciences in Gongzhuling City, China (43°19' N, 124°29' E). The annual average air

99 temperature in experimental location was 5.6 °C. The soil in this area was the typical  
100 black soil of Northeast China. Its characteristics are summarised as follows: pH,  
101 6.31 ±0.03; organic matter, 27.08 ±0.07 g/kg; total nitrogen, 0.77 ±0.07 g/kg; available  
102 phosphorus, 10.68 ±0.07 mg/kg; and available potassium, 154.10 ±0.76 mg/kg.

103 A randomized block design involving the three corn types were established with  
104 three replications in 2013 and 2014. Blocks of the same corn type were not adjacent,  
105 and each type of corn was planted in the same blocks in 2014 as in 2013. Each block  
106 was 10 m by 15 m in size. Blocks were separated by a 2-m wide clearing. Corn plants  
107 were sown on May 25 in 2013 and on May 8 in 2014, at a density of 50,000 plants per  
108 ha. Field was cultivated using standardized agricultural management practices, and no  
109 insecticides were applied during the study. The corn plants were taken away on October  
110 30, 2013, and then no cultivation practices was conducted until May 5, 2014.

111

### 112 **Leaves and leaf litterbags**

113 On October 17, 2013 when corn matured, we randomly selected 10 plants from each  
114 corn type to collect senescent leaves without petiole. For each corn type, the leaf  
115 samples were put together. These corn leaves were cut into 5-cm pieces, dried at 40°C  
116 for 72 h, and stored in a freezer at -20 °C until use.

117 The litterbags (15 cm×10 cm) were made of nylon mesh with mesh size of 5 mm.  
118 Before put into litterbags, the leaf litters were dried at 40°C for 24 h. The 27 litterbags  
119 per corn type were prepared, 10 g per bag. On November 15, 2013, all litterbags were  
120 buried into the ridge soil at a depth of 5 cm. Each type of leaf litter was buried into the  
121 block where the same corn type was planted, and there were 9 litterbags in each block.

122 To avoid edge effect, all the litterbags were buried more than 2 m away from the block  
123 border, and kept more than 1 m distance between every two adjacent litter bags. Plastic  
124 tag was set beside each bag. And to avoid destroying these litterbags and influencing the  
125 Collembola community in the litterbags, corn seeds were sowed more than 10 cm away  
126 from these litterbags in 2014.

127

### 128 **Sampling and analysis**

129 The litterbags were taken out from soil on April 20, May 20 and June 20 2014,  
130 respectively, and for each time, three litterbags per corn type were sampled. Collembola  
131 in the litterbags were extracted using the Macfadyen method [35]. The extracted  
132 organisms were preserved in 95% ethanol for identification. Then the Collembola were  
133 identified at species or morphospecies level according to references [36-39].

134 After Collembola extraction, the leaf litters were poured out from the litterbags to  
135 the glass petri dishes, the soil mixed into the litters was took away carefully, then the  
136 leaf litters were dried at 40°C for 24 hours again, the leaf litters were weighed, the  
137 decomposition rates of the leaf litters were calculated. In addition, the contents of  
138 non-structural carbohydrate [40] and total nitrogen (Foss automated Kjeltac™  
139 instruments, Model 2100) of leaf litter were also analyzed. Bt protein content of Bt-506  
140 leaf litter samples were quantified by enzyme-linked immunosorbent assay (ELISA)  
141 using a QuanliPlate Kit for Cry1Ab/Cry1Ac (Envirologix Inc., Portland, ME, USA).

### 142 **Data analyses**

143 One-way ANOVA was performed using SPSS (version 23, IBM, USA) to analyze leaf

144 litter decomposition rate, non-structural carbohydrate content, and total nitrogen content,  
145 corn type used as independent factor. A repeated measure ANOVA was performed to  
146 analyze the abundance and Shannon-Wiener index of Collembola species as well as the  
147 abundance of the dominant species *Proisotoma minuta*. In the analysis of repeated  
148 measure ANOVA, the sampling time was included as repetition levels, and the corn  
149 type was used as the “between subject” factor, and the number of collembolan  
150 individuals ( $n$ ) was transformed by  $\log_{10}(\underline{n} + 1)$  to obtain a normal distribution. The  
151 person correlation analysis was also performed using SPSS (version 23) to analyze the  
152 relationships among collembolan abundance, leaf litter decomposition rate,  
153 non-structural carbohydrate content, and total nitrogen content.

154

## 155 **Results**

### 156 **Bt protein, non-structural carbohydrate and total nitrogen contents**

157 In the litterbags of Bt-506, the content of Bt protein in leaf litters was significantly  
158 decreased over time. The original content was 536.4 ng/g before it was buried into the  
159 field, it decreased to 420.9 in April 20, to 179.5 ng/g in May 20, and only 43.5 ng/g was  
160 left June 20.

161 Repeated measure ANOVA showed that the non-structural carbohydrate content of  
162 leaf litter was significantly higher (Table 1,  $P = 0.015$ ), while the total nitrogen content  
163 was significantly lower (Table 1,  $P < 0.001$ ) in local type Zhengdan 958 than in Bt-506  
164 and its near isoline Zheng 58 types. As for each sampling time, one-way ANOVA  
165 analysis also showed that the non-structural carbohydrate content was significantly  
166 higher but the total nitrogen content was significantly lower in Zhengdan 958 than in



167 Bt-506 and Zheng 58 types on April 20 and May 20 (Table 1,  $P < 0.05$ ). And there was  
 168 no significant difference in the non-structural carbohydrate and total nitrogen contents  
 169 of three corn types when evaluated on June 20.

170 **Table 1. Effect of different corn types on leaf litter decomposition rate and the contents of**  
 171 **non-structural carbohydrate and total nitrogen in leaf litter.**

| Leaf variable                      | Sampling time | Bt-506    | Zheng 58  | Zhengdan 958 | <i>P</i> -value   |
|------------------------------------|---------------|-----------|-----------|--------------|-------------------|
| Decomposition rate (%)             | Total         | 26.7±1.6b | 25.0±2.0b | 31.5±1.9a    | <b>0.002</b>      |
|                                    | April 20      | 20.6±1.4a | 19.8±1.5a | 19.7±1.5a    | 0.886             |
|                                    | May 20        | 22.7±1.2b | 21.1±1.5b | 28.7±1.6a    | <b>0.003</b>      |
|                                    | June 20       | 36.8±2.1b | 34.0±3.0b | 46.0±2.6a    | <b>0.009</b>      |
| Non-structural carbohydrate (mg/g) | Total         | 60.5±1.3b | 61.1±1.4b | 63.8±1.0a    | <b>0.015</b>      |
|                                    | April 20      | 65.5±1.0b | 66.1±0.9b | 69.8±0.8a    | <b>0.006</b>      |
|                                    | May 20        | 62.8±0.8b | 64.0±0.6b | 67.7±1.0a    | <b>0.001</b>      |
|                                    | June 20       | 53.1±2.2a | 53.1±2.7a | 54.0±1.1a    | 0.937             |
| Total nitrogen (mg/g)              | Total         | 2.0±0.1a  | 2.0±0.1a  | 1.7±0.1b     | <b>&lt; 0.001</b> |
|                                    | April 20      | 2.1±0.1a  | 2.0±0.1a  | 1.5±0.1b     | <b>0.004</b>      |
|                                    | May 20        | 2.0±0.1a  | 2.1±0.1a  | 1.8±0.1b     | <b>0.018</b>      |
|                                    | June 20       | 2.0±0.1a  | 2.0±0.1a  | 1.8±0.1a     | 0.085             |

172 Each value represents mean ± SE. Different lowercases within a line indicate significantly different  
 173 at  $P < 0.05$ .

174

### 175 **The decomposition rate of corn leaf**

176 Repeated measure ANOVA showed that the decomposition rate of leaf litters of  
 177 different corns were significantly different (Table 1,  $P = 0.002$ ), and that of the local  
 178 type Zhengdan 958 was significantly higher than that of Bt-506 and Zheng 58 types.  
 179 One-way ANOVA analysis showed that Bt-506 and Zheng 58 types had similar leaf  
 180 litter decomposition rate for each of the three sampling dates, while Zhengdan 958 was  
 181 significantly higher in the decomposition rate of leaf litter than Bt-506 and Zheng 58  
 182 types when sampled on May 20 and June 20, but the three corn types did not show  
 183 significant difference for the samples on April 20 (Table 1).

184

185 **Collembolan abundance and Shannon-Wiener index**

186 A total of 14,707 collembolans, involved in 18 species, were extracted from all the three  
 187 corn litterbags in 2014. Among them, the dominant species was *Proisotoma minuta*,  
 188 accounting for 93.7% of the total collembolan number. In addition, *Allonychiurus songi*,  
 189 *Desoria* sp2 and *Folsomia bisetosa* were common species, accounting for 1.6, 2.4, and  
 190 1.2% respectively, while the number of other collembolan species was very few. There  
 191 were 1,864, 1,970 and 10,873 collembolans in Bt-506, Zheng 58 and Zhengdan 958  
 192 litterbags, respectively (Table 2). The collembolan community from each of the three  
 193 corn litterbags was also dominated by *P. minuta*.

194 **Table 2. The number and percentage of different Collembola species in litterbags of different**  
 195 **corn types.**

| Collembola                    | Bt-506 |                | Zheng 58 |                | Zhengdan 958 |                | Total  |                |
|-------------------------------|--------|----------------|----------|----------------|--------------|----------------|--------|----------------|
|                               | Number | Percentage (%) | Number   | Percentage (%) | Number       | Percentage (%) | Number | Percentage (%) |
| <i>Allonychiurus songi</i>    | 78     | 4.18           | 89       | 4.52           | 69           | 0.63           | 236    | 1.60           |
| <i>Tullbergia yosii</i>       | 2      | 0.11           | 0        | 0.00           | 1            | 0.01           | 3      | 0.02           |
| <i>Proisotoma minuta</i>      | 1512   | 81.12          | 1709     | 86.75          | 10570        | 97.21          | 13791  | 93.77          |
| <i>Parisotoma notabilis</i>   | 2      | 0.11           | 4        | 0.20           | 9            | 0.08           | 15     | 0.10           |
| <i>Desoria</i> sp1            | 0      | 0.00           | 1        | 0.05           | 0            | 0.00           | 1      | 0.01           |
| <i>Desoria</i> sp2            | 198    | 10.62          | 105      | 5.33           | 53           | 0.49           | 356    | 2.42           |
| <i>Folsomia bisetosa</i>      | 10     | 0.54           | 21       | 1.07           | 139          | 1.28           | 170    | 1.16           |
| <i>Folsomides parvulus</i>    | 2      | 0.11           | 2        | 0.10           | 1            | 0.01           | 5      | 0.03           |
| <i>Isotomedes</i> sp1         | 3      | 0.16           | 8        | 0.41           | 2            | 0.02           | 13     | 0.09           |
| <i>Isotomedes</i> sp2         | 12     | 0.64           | 5        | 0.25           | 7            | 0.06           | 24     | 0.16           |
| <i>Orchesellides sinensis</i> | 1      | 0.05           | 0        | 0.00           | 4            | 0.04           | 5      | 0.03           |
| <i>Entomobrya</i> sp1         | 10     | 0.54           | 13       | 0.66           | 5            | 0.05           | 28     | 0.19           |
| <i>Entomobrya koreana</i>     | 30     | 1.61           | 11       | 0.56           | 7            | 0.06           | 48     | 0.33           |
| <i>Homidia phjongiangica</i>  | 0      | 0.00           | 0        | 0.00           | 1            | 0.01           | 1      | 0.01           |
| <i>Orchesellides sinensis</i> | 1      | 0.05           | 0        | 0.00           | 5            | 0.05           | 6      | 0.04           |
| <i>Hypogastrura</i> sp1       | 2      | 0.11           | 1        | 0.05           | 0            | 0.00           | 3      | 0.02           |
| <i>Sminthuride</i> sp1        | 1      | 0.05           | 0        | 0.00           | 0            | 0.00           | 1      | 0.01           |
| <i>Sminthuride</i> sp2        | 0      | 0.00           | 1        | 0.05           | 0            | 0.00           | 1      | 0.01           |
| Total                         | 1864   | 100.00         | 1970     | 100.00         | 10873        | 100.00         | 14707  | 100.00         |

196 For the total collembolan samples collected at three times, repeated measure  
 197 ANOVA showed that both the abundance of total collembolan species and the

198 abundance of *P. minuta* did not show significantly different between Bt-506 and Zheng  
 199 58, they were both significantly lower than that in Zhengdan 958 (Table 3). As for the  
 200 samples at each time, one-way ANOVA showed that the abundance of total collembolan  
 201 species and *P. minuta* from the litterbags of Bt-506 were not significantly different from  
 202 that of its near isoline Zheng 58, but they were both significantly lower than those from  
 203 local type Zhengdan 958 when collembolans were sampled on May 20. The two indexes  
 204 were not significantly different among the three corn types on April 20 and on June 20.

205 The Shannon-Wiener index of the total collembolan species collected at three  
 206 times from Bt-506 and Zheng 58 were not significantly different when analyzed by  
 207 repeated measure ANOVA, while they were both significantly higher than that from  
 208 Zhengdan 958 when analyzed by repeated measure ANOVA. The Shannon-Wiener  
 209 indexes of the collembolan samples at each time from Bt-506 and Zheng 58 were also  
 210 similar, which was revealed by one-way ANOVA, and they both had not significant  
 211 difference compared to that from Zhengdan 958 on June 20. However the differences  
 212 among the three corn types were not consistent at every time. For example, ANOVA  
 213 showed that on April 20 the Shannon-Wiener index of the collembolan from Bt-506 was  
 214 higher than that from Zheng 58 and Zhengdan 958, while it was nearly the same as that  
 215 from Zheng 58 and higher than that from Zhengdan958 on May 20 (Table 3).

216 **Table 3. Effects of different corn types on abundance and Shannon-Wiener index of**  
 217 **Collembola in litterbags.**

| Collembolan variable        | Sampling time | Bt-506          | Zheng 58        | Zhengdan 958     | P-value        |
|-----------------------------|---------------|-----------------|-----------------|------------------|----------------|
| Total collembolan abundance | Total         | 69.07 ± 23.99b  | 72.96 ± 22.45b  | 402.67 ± 100.94a | < <b>0.001</b> |
|                             | April 20      | 100.00 ± 49.01a | 146.78 ± 51.99a | 294.67 ± 96.08a  | 0.137          |
|                             | May 20        | 75.56 ± 10.60b  | 54.67 ± 9.15b   | 903.33 ± 203.99a | < <b>0.001</b> |
|                             | June 20       | 31.67 ± 12.37a  | 17.44 ± 6.20a   | 10.00 ± 2.75a    | 0.182          |
| <i>P. minuta</i>            | Total         | 56.04 ± 21.41b  | 63.30 ± 20.55b  | 391.44 ± 99.59a  | < <b>0.001</b> |

|                      |          |                |                 |                 |                   |
|----------------------|----------|----------------|-----------------|-----------------|-------------------|
| abundance            | April 20 | 90.78 ± 48.67a | 136.11 ± 49.98a | 286.89 ± 94.68a | 0.123             |
|                      | May 20   | 66.89 ± 10.02b | 48.56 ± 8.28b   | 882.67 ± 202.2a | <b>&lt; 0.001</b> |
|                      | June 20  | 10.44 ± 5.55a  | 5.22 ± 3.40a    | 4.78 ± 1.88a    | 0.531             |
| Total                |          | 0.80 ± 0.15a   | 0.79 ± 0.12a    | 0.54 ± 0.14b    | <b>0.022</b>      |
| Shannon-Wiener index | April 20 | 0.84 ± 0.19a   | 0.67 ± 0.11ab   | 0.36 ± 0.08b    | 0.060             |
|                      | May 20   | 0.59 ± 0.07a   | 0.62 ± 0.08a    | 0.32 ± 0.10b    | <b>0.043</b>      |
|                      | June 20  | 0.97 ± 0.19a   | 1.08 ± 0.17a    | 0.92 ± 0.25a    | 0.863             |

218 Each value represents mean ± SE. Different lowercases within a line indicate significantly different  
 219 at  $P < 0.05$ .

220

221 **The correlation among collembolan abundance, leaf litter decomposition rate,**  
 222 **non-structural carbohydrate content and total nitrogen content**

223 The collembolan abundance was significantly positively correlated with the  
 224 non-structural carbohydrate content and decomposition rate of leaf litter, and was  
 225 significantly negatively correlated with the total nitrogen content of leaf litter for the  
 226 samples on May 20 (Table 4). The decomposition rate of leaf litter was also  
 227 significantly positively correlated with its non-structural carbohydrate content, and was  
 228 significantly negatively correlated with its total nitrogen content when we sampled on  
 229 May 20, (Table 4). However, there was no significant correlation among collembolan  
 230 abundance, leaf litter decomposition rate, non-structural carbohydrate content and total  
 231 nitrogen content when sampling on 20 April or on 20 June (Table 4).

232 **Table 4. Correlation coefficient between collembolan abundance, leaf litter decomposition rate**  
 233 **and leaf litter indexes (including non-structural carbohydrate content, total nitrogen content).**

|                       | Sampling time | Non-structural carbohydrate content | Total nitrogen content | Decomposition rate |
|-----------------------|---------------|-------------------------------------|------------------------|--------------------|
| Collembolan abundance | April 20      | 0.379                               | -0.111                 | 0.370              |
|                       | May 20        | <b>0.412*</b>                       | <b>-0.544**</b>        | <b>0.683**</b>     |
|                       | June 20       | 0.269                               | 0.105                  | 0.121              |
| Decomposition rate    | April 20      | -0.144                              | -0.312                 |                    |
|                       | May 20        | <b>0.549**</b>                      | <b>-0.536**</b>        |                    |
|                       | June 20       | 0.130                               | -0.323                 |                    |

234 \* and \*\* mean significantly correlated at 0.05 and 0.01.

## 235 **Discussion**

236 Our study clearly showed that the Bt protein content of Bt-506 residue was decreased  
237 over time. The degradation of Bt protein is relatively slow in the first five months due to  
238 the low temperature, after April, it was accelerated significantly with the temperature  
239 increasing in Northeast China, but 8.1% still remained after buried into field for 7  
240 months. However, there were no significant differences in leaf litter decomposition rate  
241 and collembolan abundance between Bt-506 and its near isoline Zheng 58 types in all  
242 sampling times. These results were the same as most of the previous studies on Bt corn.  
243 For example, Zurbrügg et al. [6] and Xiao et al. [41] have found that the decomposition  
244 rates were not different between Bt and non-Bt crops but among transgenic hybrids and  
245 among conventional hybrids through litterbag studies. Grigioni et al. [42], Zwahlen et al.  
246 [9] and Hönemann et al.[5] also found that the litters of Bt corns did not affect  
247 collembolan community. Besides, the Bt litters from other Bt crops, such as Bt cotton  
248 [26] and Bt rice [43], did not affect collembolan community either. These results  
249 indicated that the Bt protein of Bt-506 event did not affect the decomposition rate of  
250 Bt-506 leaf litter and the collembolan community in the field in short term.

251 However, repeated measures ANOVA showed that the decomposition rates of leaf  
252 litter, the abundances of total Collembola species and the abundance of the dominant  
253 species *P. minuta* in the little bag of local type Zhengdan 958 were all significantly  
254 higher than that of Bt-506 and its near isoline Zheng 58 types. This might be due to the  
255 significant different chemical compositions of different corn leaves.

256 In this study, we found that the local type Zhengdan 958 had higher non-structural  
257 carbohydrate content and lower total nitrogen content than Bt-506 and its near isoline

258 Zheng 58 on April 20 and May 20. Some previous studies found that the total nitrogen  
259 amount of litter influenced litter decomposition rate and colonization by fungi and  
260 bacteria in microcosms [13, 14]. And most of the soil Collembola was feed on these  
261 microorganisms [18], for example the dominant species *P. minuta* in our study is just a  
262 kind of fungivore [44], this species may be very abundant in the agriculture soil due to  
263 its preference for particular kinds of organic material [45]. At the same time, our study  
264 also showed that the abundance of collembolan and the litter decomposition rate of leaf  
265 litter were significantly correlated with the non-structural carbohydrate and total  
266 nitrogen contents of leaf litter, and the collembolan abundance was significantly  
267 positively correlated with leaf litter decomposition rate on May 20. Thus the higher  
268 decomposition rate of leaf litter and more abundance of collembolan for local type  
269 Zhengdan 958 were probably caused by the higher non-structural carbohydrate content  
270 and lower total nitrogen content in local corn Zhengdan 958.

271 The decomposition rate of leaf litter was not significant different among the three  
272 corn types, and there was no significant correlation among collembolan abundance, leaf  
273 litter decomposition rate, and the contents of non-structural carbohydrate and contents  
274 of total nitrogen on April 20, this may be due to the low temperature at that time. In  
275 Northeast China, as the temperature is very low in experimental field from November to  
276 April (most of the time is below 0 °C), when the soil fauna are in dormancy stage or  
277 inactive, the decomposition of litter residue was restricted.

278 With temperature rising, the soil fauna began to become active, and the leaf residue  
279 began to be decomposed quickly. By June 20, nearly half of the local type Zhengdan  
280 958 residue was decomposed, and about a third of litters of Bt-506 and its near isoline

281 Zheng 58 were decomposed. With leaf litter reducing, the collembolan abundance and  
282 the non-structural carbohydrate and total nitrogen contents of leaf litter in litterbags  
283 became similar for the three corn types; and there was no more significant correlation  
284 among collembolan abundance, leaf litter decomposition rate, contents of non-structural  
285 carbohydrate and contents of total nitrogen at this time.

286

## 287 **Conclusions**

288 Our field study revealed that in the black soil region of China, Bt protein from  
289 transgenic corn plant didn't significantly influenced the decomposition rate of leaf litter  
290 and the abundance of Collembola in Bt-506 litter bag when compared with its near  
291 isoline Zheng 58 in short term. Local type possesses higher non-structural carbohydrate  
292 content but lower total nitrogen content compared with Bt-506 and its near isoline  
293 Zheng 58 types, which probably was the main reason causing a higher decomposition  
294 rate of leaf litter and a higher abundance of Collembola in the leaf litterbags of local  
295 type Zhengdan 958.

296

## 297 **Supporting information**

298 **S1 File. Raw data.** The collembolan composition, leaf litter decomposition rate and the  
299 non-structural carbohydrate content and total nitrogen content in the leaf litters were included.

300

## 301 **Acknowledgements**

302 We thank Professor Louis Deharveng from the Muséum national d'Histoire naturelle,  
303 France for identifying some of Collembola species. We thank Professor Jinsheng Lai

304 from China Agricultural University for providing all corn seeds. We also thank  
305 Professor Sina Adl from University of Saskatchewan, Canada for revising the language.  
306 This project was supported by the Genetically Modified Organisms Breeding Major  
307 Projects, China (2016ZX08011-003), the National Nature Science Fund of China  
308 (31500345), and the innovation project of Jilin Academy of Agriculture Sciences, China  
309 (C6215000222).

310

### 311 **Author Contributions**

312 **Conceptualization:** Baifeng Wang, Xinyuan Song.

313 **Supervision:** Xinyuan Song.

314 **Investigation:** Baifeng Wang, Fengci Wu, Junqi Yin.

315 **Data analysis:** Baifeng Wang, Fengci Wu, Ling Zhang, Xinyuan Song.

316 **Writing - original draft:** Baifeng Wang, Fengci Wu, Xinyuan Song.

317 **Writing -review & editing:** Baifeng Wang, Fengci Wu, Xinyuan Song.

318

### 319 **References**

- 320 1. Shelton AM, Zhao JZ, Roush RT. Economic, ecological, food safety, and social  
321 consequences of the deployment of Bt transgenic plants. *Ann Rev Entomol.* 2002; 47:  
322 845-881. <https://doi.10.1146/annurev.ento.47.091201.145309>.
- 323 2. Glaser JA, Matten SR. Sustainability of insect resistance management strategies for  
324 transgenic Bt corn. *Biotechnol Adv.* 2003; 22: 45-69.  
325 <https://doi.10.1016/j.biotechadv.2003.08.016>.
- 326 3. Hurley TM, Langrock I, Ostlie K. Estimating the benefits of Bt corn and cost of insect



- 327 resistance management ex ante. *J Agr Resour Econ.* 2006; 31: 355-375. <https://doi.>
- 328 [10.1016/j.japwor.2004.12.005](https://doi.org/10.1016/j.japwor.2004.12.005).
- 329 4. Zwahlen C, Hilbeck A, Gugerli P, Nentwig W. Degradation of the Cry1Ab protein within
- 330 transgenic bacillus thuringiensis corn tissue in the field. *Mol Ecol.* 2003; 12: 765-775.
- 331 [https://doi. 10.1046/j.1365-294X.2003.01767.x](https://doi.org/10.1046/j.1365-294X.2003.01767.x).
- 332 5. Hönemann L, Zurbrugg C, Nentwig W. Effects of Bt-corn decomposition on the composition
- 333 of the soil meso- and macrofauna. *Appl Soil Ecol.* 2008; 40: 203-209. <https://doi.>
- 334 [10.1016/j.apsoil.2008.04.006](https://doi.org/10.1016/j.apsoil.2008.04.006).
- 335 6. Zurbrugg C, Hönemann L, Meissle M, Romeis J, Nentwig W. Decomposition dynamics and
- 336 structural plant components of genetically modified Bt maize leaves do not differ from leaves
- 337 of conventional hybrids. *Transgenic Res.* 2010; 19: 257-267. <https://doi.>
- 338 [10.1007/s11248-009-9304-x](https://doi.org/10.1007/s11248-009-9304-x).
- 339 7. Kamota A, Muchaonyerwa P, Mkeni PNS. Decomposition of surface-applied and
- 340 soil-incorporated Bt maize leaf litter and Cry1Ab protein during winter fallow in South
- 341 Africa. *Pedosphere.* 2014; 24: 251-257. [https://doi. 10.1016/S1002-0160\(14\)60011-4](https://doi.org/10.1016/S1002-0160(14)60011-4).
- 342 8. Böttger R, Schaller J, Lintow S, Gert Dudel E. Aquatic degradation of Cry1Ab protein and
- 343 decomposition dynamics of transgenic corn leaves under controlled conditions. *Ecotox*
- 344 *Environ Safe.* 2015; 113: 454-459. [https://doi. 10.1016/j.ecoenv.2014.12.034](https://doi.org/10.1016/j.ecoenv.2014.12.034).
- 345 9. Zwahlen C, Hilbeck A, Nentwig W. Field decomposition of transgenic Bt maize residue and
- 346 the impact on non-target soil invertebrates. *Plant Soil.* 2007; 300: 245-257. <https://doi.>
- 347 [10.1007/s11104-007-9410-6](https://doi.org/10.1007/s11104-007-9410-6).
- 348 10. Böttger R, Schaller J, Lintow S, Gert Dudel E. Aquatic degradation of Cry1Ab protein and
- 349 decomposition dynamics of transgenic corn leaves under controlled conditions. *Ecotox*

- 350 Environ Safe. 2015; 113, 454-459. [https://doi. 10.1016/j.ecoenv.2014.12.034](https://doi.org/10.1016/j.ecoenv.2014.12.034).
- 351 11. Saxena D, Stotzky G. Bt corn has a higher lignin content than non-Bt corn. *Am J Bot.* 2001;  
352 88: 1704–1706. [https://doi. 10.2307/3558416](https://doi.org/10.2307/3558416).
- 353 12. Fang M, Motavalli PP, Kremer RJ, Nelson KA. Assessing changes in soil microbial  
354 communities and carbon mineralization in Bt and non-Bt corn residue-amended soils. *App*  
355 *Soil Ecol.* 2007; 37: 150–160. [https://doi. 10.1016/j.apsoil.2007.06.001](https://doi.org/10.1016/j.apsoil.2007.06.001).
- 356 13. Henriksen TM, Breland TA. Nitrogen availability effects on carbon mineralization, fungal  
357 and bacterial growth, and enzyme activities during decomposition of wheat straw in soil. *Soil*  
358 *Biol Biochem.* 1999; 31: 1121-1134. [https://doi. 10.1016/S0038-0717\(99\)00030-9](https://doi.org/10.1016/S0038-0717(99)00030-9).
- 359 14. Güsewell S, Gessner MO. N: P ratios influence litter decomposition and colonization by  
360 fungi and bacteria in microcosms. *Funct Ecol.* 2010; 23: 211-219. [https://doi.](https://doi.org/10.1111/j.1365-2435.2008.01478.x)  
361 [10.1111/j.1365-2435.2008.01478.x](https://doi.org/10.1111/j.1365-2435.2008.01478.x).
- 362 15. Escher N, K äch B, Nentwig W. Decomposition of transgenic *Bacillus thuringiensis* maize by  
363 microorganisms and woodlice *Porcellio scaber* (Crustacea: Isopoda). *Basic Appl Ecol.* 2000;  
364 1: 161–169. [https://doi. 10.1078/1439-1791-00024](https://doi.org/10.1078/1439-1791-00024).
- 365 16. Icoz I, StotzkyG. Fate and effects of insect-resistant Bt crops in soil ecosystems. *Soil Biol*  
366 *Biochem.* 2008; 40: 559-586. [https://doi. 10.1016/j.soilbio.2007.11.002](https://doi.org/10.1016/j.soilbio.2007.11.002).
- 367 17. Hopkin SP. *Biology of the Springtails (Insecta: Collembola)[M]// Biology of the springtails*  
368 *(Insecta, Collembola)*. Oxford University Press. 1997.
- 369 18. Rusek J. Biodiversity of collembola and their functional role in the ecosystem. *Biodivers*  
370 *Conserv.* 1998; 7: 1207 - 1219. [https://doi. 10.1023/a:1008887817883](https://doi.org/10.1023/a:1008887817883).
- 371 19. Bardgett RD, Putten WHVD. Belowground biodiversity and ecosystem functioning. *Nature.*  
372 2014; 515: 505-511. [https://doi.10.1038/nature13855](https://doi.org/10.1038/nature13855).

- 373 20. Rebek EJ, Hogg DB, Young DK. Effect of four cropping systems on the abundance and  
374 diversity of epedaphic Springtails (Hexapoda: Parainsecta: Collembola) in Southern  
375 Wisconsin. *Environ Entomol.* 2002; 31: 37-46. [https://doi. 10.1603/0046-225X-31.1.37](https://doi.org/10.1603/0046-225X-31.1.37).
- 376 21. Santorufo L, Cortet J, Arena C, Goudon R, Rakoto A, Morel JL, et al. An assessment of the  
377 influence of the urban environment on collembolan communities in soils using taxonomy and  
378 trait-based approaches. *Appl Soil Ecol.* 2014; 78: 48-56. [https://doi.](https://doi.org/10.1016/j.apsoil.2014.02.008)  
379 [10.1016/j.apsoil.2014.02.008](https://doi.org/10.1016/j.apsoil.2014.02.008).
- 380 22. Rossetti I, Bagella S, Cappai C, Caria MC, Lai R, Roggero PP, et al. Isolated cork oak trees  
381 affect soil properties and biodiversity in a mediterranean wooded grassland. *Agric Ecosyst*  
382 *Environ.* 2015; 202: 203-216. [https://doi. 10.1016/j.agee.2015.01.008](https://doi.org/10.1016/j.agee.2015.01.008).
- 383 23. Moore JC, Berlow EL, Coleman DC, Ruitter PC, Dong Q, Hastings A, Johnson NC, McCann  
384 KS, Melville K, et al. Detritus, trophic dynamics and biodiversity. *Ecol Lett.* 2004; 7:  
385 584–600. [https://doi. 10.1111/j.1461-0248.2004.00606.x](https://doi.org/10.1111/j.1461-0248.2004.00606.x).
- 386 24. Endlweber K, Ruess L, Scheu S. Collembola switch diet in the presence of plant roots  
387 thereby functioning as herbivores. *Soil Biol Biochem.* 2009; 41: 1151–1154. [https://doi.](https://doi.org/10.1016/j.soilbio.2009.02.022)  
388 [10.1016/j.soilbio.2009.02.022](https://doi.org/10.1016/j.soilbio.2009.02.022).
- 389 25. Bitzer RJ, Rice ME, Pilcher CD, Pilcher CL, Lam WF. Biodiversity and community structure  
390 of epedaphic and euedaphic springtails (Collembola) in transgenic rootworm Bt corn.  
391 *Environ Entomol.* 2005; 34: 1346-1376. [https://doi.](https://doi.org/10.1603/0046-225X(2005)034[1346:BACSOE]2.0.CO;2)  
392 [10.1603/0046-225X\(2005\)034\[1346:BACSOE\]2.0.CO;2](https://doi.org/10.1603/0046-225X(2005)034[1346:BACSOE]2.0.CO;2).
- 393 26. Chang L, Liu XH, Ge F. Effect of elevated O<sub>3</sub> associated with Bt cotton on the abundance,  
394 diversity and community structure of soil Collembola. *Appl Soil Ecol.* 2011; 47: 45-50.  
395 [https://doi. 10.1016/j.apsoil.2010.10.013](https://doi.org/10.1016/j.apsoil.2010.10.013).

- 396 27. Arias-Martín M, García M, Luciáñez MJ, Ortego F, Castañera P, Farinós GP. Effects of  
397 three-year cultivation of Cry1Ab-expressing Bt maize on soil microarthropod communities.  
398 *Agr Ecosyst Environ.* 2016; 220: 125-134. [https://doi. 10.1016/j.agee.2015.09.007](https://doi.org/10.1016/j.agee.2015.09.007).
- 399 28. Song XY, Chang L, Reddy Gadi VP, Zhang L, Fan CM, Wang BF. Use of taxonomic and  
400 trait-based approaches to evaluate the effects of transgenic Cry1Ac corn on the community  
401 characteristics of soil Collembola. *Environ Entomo.* 2019; 48: 263-269. *Environ Entomo* 48:  
402 263-269. [https://doi. 10.1093/ee/nvy187](https://doi.org/10.1093/ee/nvy187).
- 403 29. Bellinger PF, Christiansen KA, Janssens F. Checklist of the Collembola of the World.  
404 <http://www.collembola.org>. (accessed 14 May 2019); 2019.
- 405 30. Heckmann LH, Griffiths BS, Caul S, Thompson J, Pusztai-Carey M, Moar WJ, Andersen  
406 MN, Krogh PH. Consequences for *Protaphorura armata* (Collembola: Onychiuridae)  
407 following exposure to genetically modified *Bacillus thuringiensis* (Bt) maize and non-Bt  
408 maize. *Environ Pollut.* 2006; 142: 212-216. [https://doi. 10.1016/j.envpol.2005.10.008](https://doi.org/10.1016/j.envpol.2005.10.008).
- 409 31. Yuan YY, Ke X, Chen FJ, Krogh PH, Ge F. Decrease in catalase activity of *Folsomia*  
410 *candida* fed a Bt rice diet. *Environ Pollut.* 2011; 159: 3714-3720. [https://doi.](https://doi.org/10.1016/j.envpol.2011.07.015)  
411 [10.1016/j.envpol.2011.07.015](https://doi.org/10.1016/j.envpol.2011.07.015).
- 412 32. Yuan YY, Xiao NW, Krogh PH, Chen FJ, Ge F. Laboratory assessment of the impacts of  
413 transgenic Bt rice on the ecological fitness of the soil non-target arthropod, *Folsomia candida*  
414 (Collembola: Isotomidae). *Transgenic Res.* 2013; 22: 791-803. [https://doi.](https://doi.org/10.1007/s11248-013-9687-6)  
415 [10.1007/s11248-013-9687-6](https://doi.org/10.1007/s11248-013-9687-6).
- 416 33. Szabó B, Seres A, Bakonyi G, Szabó B, Seres A, Bakonyi G. Long-term consumption and  
417 food replacement of near-isogenic by Bt-maize alter life-history traits of *Folsomia candida*  
418 willem 1902 (Collembola). *Appli Ecol Env Res.* 2017; 15: 1275-1286. [https://doi.](https://doi.org/10.1007/s11248-013-9687-6)

- 419 10.15666/aeer/1504\_12751286.
- 420 34. Zhang B, Yang Y, Zhou X, Shen P, Peng Y, Li Y. A laboratory assessment of the potential  
421 effect of cry1ab/cry2aj-containing Bt maize pollen on *Folsomia candida* by toxicological and  
422 biochemical analyses. Environ Pollut. 2017; 222: 94-100. [https://doi.  
423 10.1016/j.envpol.2016.12.079](https://doi.10.1016/j.envpol.2016.12.079).
- 424 35. Macfadyen A. Improved funnel-type extractors for soil arthropods. J. Anim Ecol. 1961; 30:  
425 171–184. [https://doi. 10.2307/2120](https://doi.10.2307/2120).
- 426 36. Christiansen K, Bellinger P. The Collembola of North America north of the Rio Grand.  
427 Grinnell College, Grinnell, Iowa; 1980.
- 428 37. Pomorski RJ. Onychiurinae of Poland (Collembola: Onychiuridae). Polish Taxonomical  
429 Society, Wrocklaw; 1998.
- 430 38. Yin WY. Pictorial Keys to Soil Animals of China. Science Press, Beijing, pp. 282-292,  
431 592-600; 1998.
- 432 39. Potapov M. Synopses on Palaearctic Collembola: Isotomidae. Abhandlungen und Berichte  
433 des Naturkundemuseums G ̈rlitz; 2001.
- 434 40. Tissue DT, Wright SJ. Effects of seasonal water availability on phenology and the annual  
435 shoot carbohydrate cycle of tropical forest shrubs. Funct Ecol. 1995; 9: 518–527. [https://doi.  
436 10.2307/2390018](https://doi.10.2307/2390018).
- 437 41. Xiao MQ, Fang CM, Dong SS, Tang X, Chen Y, Yang SM, et al. Litterbag decomposition of  
438 litters from *Bacillus thuringiensis* (Bt) rice hybrids and the parental lines under multiple field  
439 conditions. J. Soils Sediment. 2014; 14: 1669-1682. [https://doi. 10.1007/s11368-014-0933-1](https://doi.10.1007/s11368-014-0933-1).
- 440 42. Grigioni M, Daniele C, D'Avenio G, Barbaro V. Field decomposition of transgenic Bt maize  
441 residue and the impact on non-target soil invertebrates. Plant Soil. 2007; 300: 245-257.

442 [https://doi. 10.1007/s11104-007-9410-6](https://doi.org/10.1007/s11104-007-9410-6).

443 43. Bai YY, Yan RH, Ye GY, Huang FN, Cheng JA. Effects of transgenic rice expressing  
444 *Bacillus thuringiensis* Cry1Ab protein on ground-dwelling collembolan community in  
445 postharvest seasons. *Environ. Entomol.* 2010; 39: 243-251. [https://doi. 10.1603/EN09149](https://doi.org/10.1603/EN09149).

446 44. Harasymek L, Sinha RN. Survival of Springtails *Hypogastrura tullbergi* and *Proisotoma*  
447 *minuta* on Fungal and Bacterial diets. *Environ Entomol.* 1974; 3: 965-968. [https://doi.](https://doi.org/10.1093/ee/3.6.965)  
448 [10.1093/ee/3.6.965](https://doi.org/10.1093/ee/3.6.965).

449 45. Santorufo L, Cortet J, Nahmani J, Pernin C, Salmon S, Pernot A, et al. Responses of  
450 functional and taxonomic collembolan community structure to site management in  
451 Mediterranean urban and surrounding area. *Eur J Soil Biol.* 2015; 70: 46-57. [https://doi.](https://doi.org/10.1016/j.ejsobi.2015.07.003)  
452 [10.1016/j.ejsobi.2015.07.003](https://doi.org/10.1016/j.ejsobi.2015.07.003).

453
